# Supplementary material
Source: ML conference proceedings conference paper supplement (https://openreview.net/forum?id=tUJsazmoXL)
Supplement: supplementary_material [file attachment]

# Optimizing Visual Question Answering Models for Driving: Bridging the Gap Between Human and Machine Attention Patterns

## Supplementary Material

617        The figures show a Progressive object detection enhance-  
618        ment: (Left to Right) Image from the NuImages dataset,  
619        Human object detection for the same image, Object detec-  
620        tion of the pre-trained LXMERT model, and Object detec-  
621        tion with the proposed filter integrated.

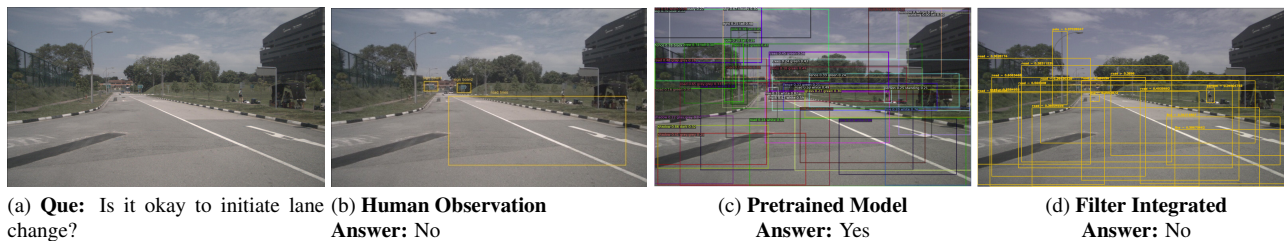

Figure 6. Answers for Back Left Camera Image - 1

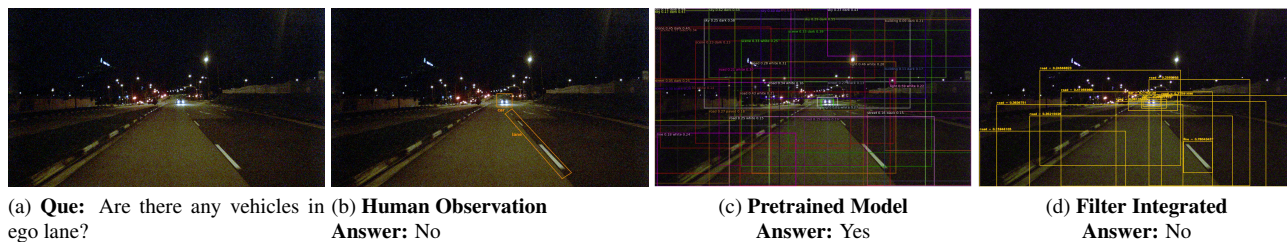

Figure 7. Answers for Back Camera Image - 2

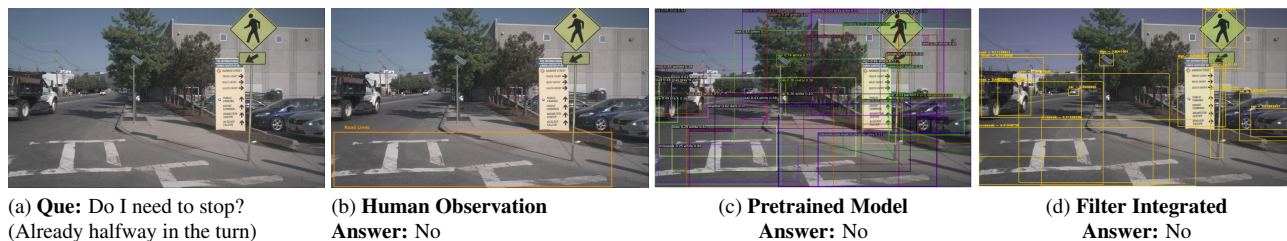

Figure 8. Answers for Back Right Camera Image - 1

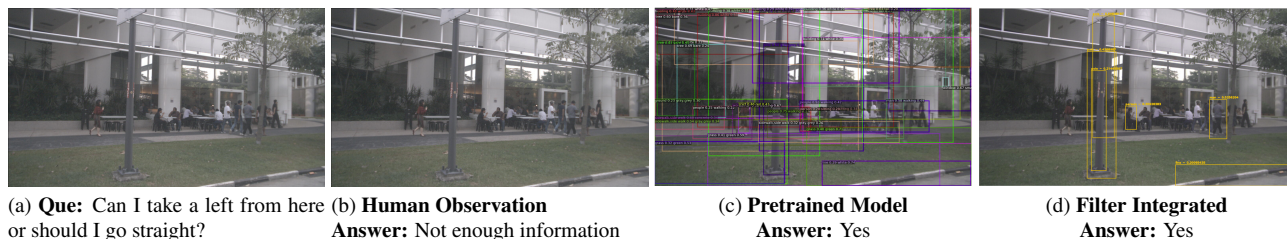

Figure 9. Answers for Front Left Camera Image - 1

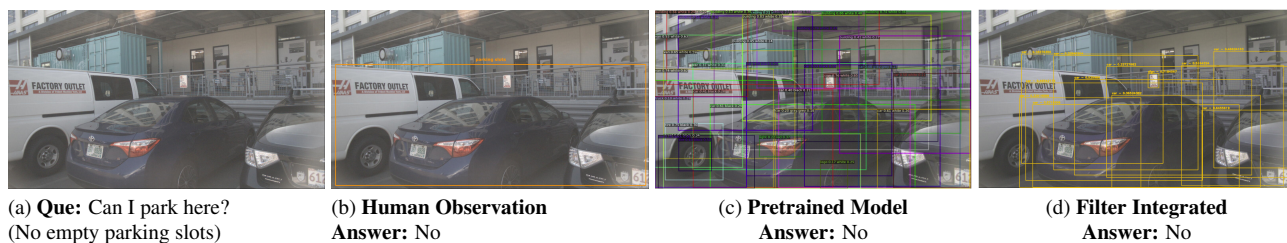

Figure 10. Answers for Front Right Camera Image - 1
